# Supplementary material for: Lipoic acid capped silver nanoparticles: a facile route to covalent protein capping and oxidative stability within biological systems
Source: Royal Society of Chemistry journal article supplement (doi:10.1039/d0ra07080g), 2020-01-01
Supplement: d0ra07080g1.pdf [file d0ra07080g1.pdf]

Electronic Supplementary Information (ESI) for:

**Lipoic Acid Capped Silver Nanoparticles: A Facile Route to Covalent Protein Capping and Oxidative Stability Within Biological Systems**

Irene Guzmán-Soto <sup>a</sup>, Mary Omole <sup>a</sup>, Emilio I. Alarcon <sup>\*ab</sup>, and Christopher D. McTiernan <sup>\*a</sup>

---

<sup>a</sup> *Division of Cardiac Surgery, University of Ottawa Heart Institute, 40 Ruskin Street, Ottawa, Canada.*

<sup>b</sup> *Department of Biochemistry, Microbiology, and Immunology, Faculty of Medicine, University of Ottawa, Ottawa, Canada.*

\*Corresponding author e-mails: [ealarcon@ottawaheart.ca](mailto:ealarcon@ottawaheart.ca), [cmctiernan@ottawaheart.ca](mailto:cmctiernan@ottawaheart.ca)

## Table of Contents

|                                                                                   |    |
|-----------------------------------------------------------------------------------|----|
| S1. SDS-Electrophoresis of HSA-AgNP Conjugate                                     | S3 |
| S2. TEM and Size Histogram of Lipoic Acid Capped AgNP                             | S4 |
| S3. Composition of DMEM – High Glucose Liquid Media (HyClone Cat. No. SH30284.01) | S7 |

## S1. SDS-Electrophoresis of HSA-AgNP Conjugate

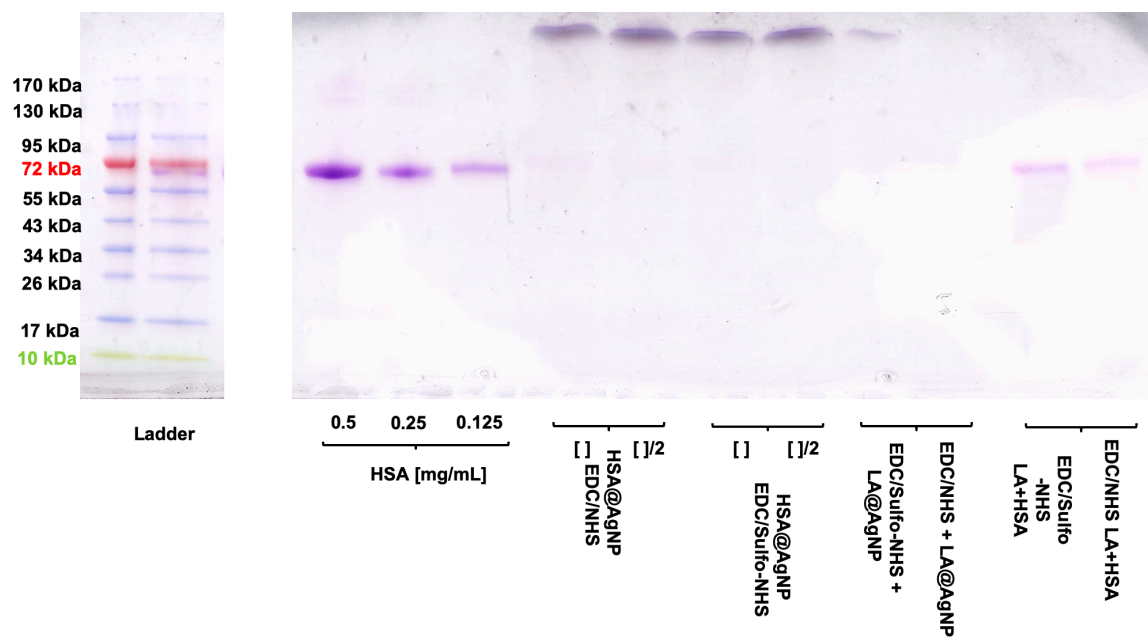

**Figure S1.** Representative image of SDS-Electrophoresis experiment. The gel was run for 1 h at 80 V. Gel was stained with Coomassie Blue R-250 to visualize the protein bands. Image was obtained by scanning gel.

## S2. TEM and Size Histogram of Lipoic Acid Capped AgNP

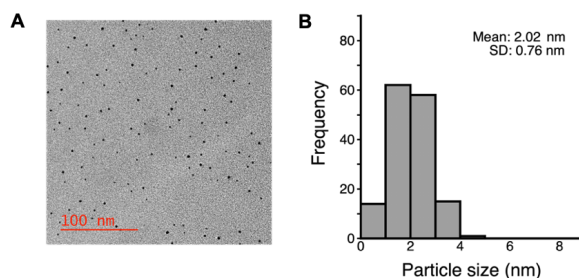

**Figure S2.** A) TEM image of 0  $\mu\text{M}$  lipoic acid AgNP. B) Corresponding size histogram with >100 random particles counted per sample.

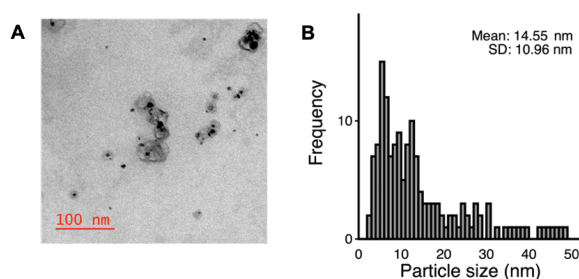

**Figure S3.** A) TEM image of 2.5  $\mu\text{M}$  lipoic acid AgNP. B) Corresponding size histogram with >100 random particles counted per sample.

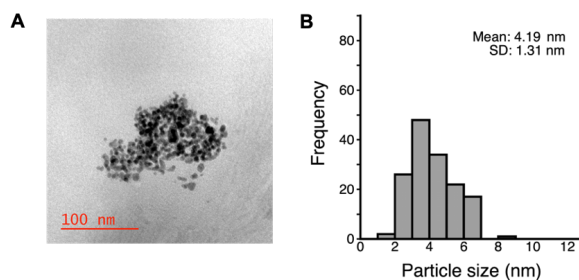

**Figure S4.** A) TEM image of 5  $\mu\text{M}$  lipoic acid AgNP. B) Corresponding size histogram with >100 random particles counted per sample.

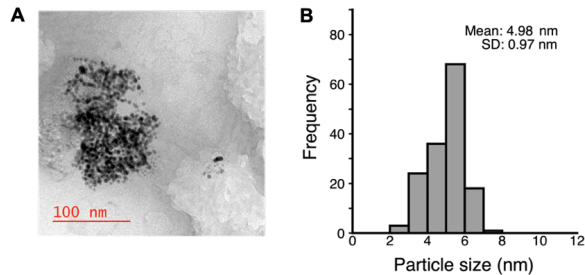

**Figure S5.** A) TEM image of 10  $\mu\text{M}$  lipoic acid AgNP. B) Corresponding size histogram with >100 random particles counted per sample.

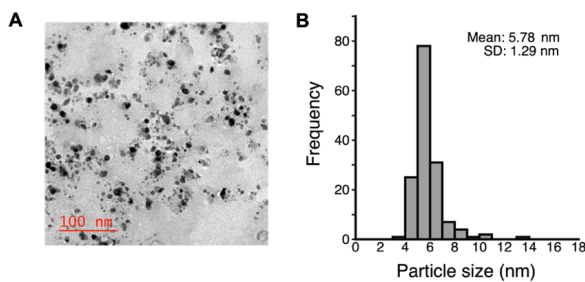

**Figure S6.** A) TEM image of 20  $\mu\text{M}$  lipoic acid AgNP. B) Corresponding size histogram with >100 random particles counted per sample.

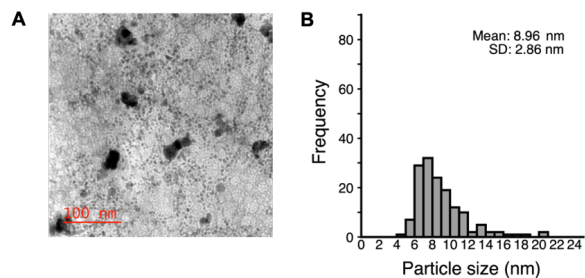

**Figure S7.** A) TEM image of 40  $\mu\text{M}$  lipoic acid AgNP. B) Corresponding size histogram with >100 random particles counted per sample.

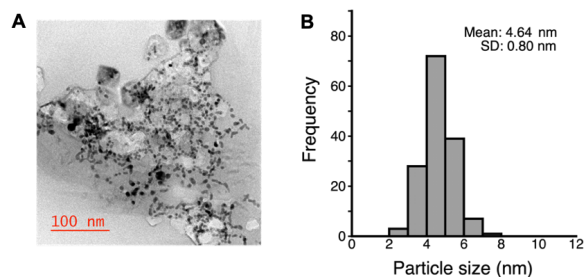

**Figure S8.** A) TEM image of 80  $\mu\text{M}$  lipoic acid AgNP. B) Corresponding size histogram with >100 random particles counted per sample.

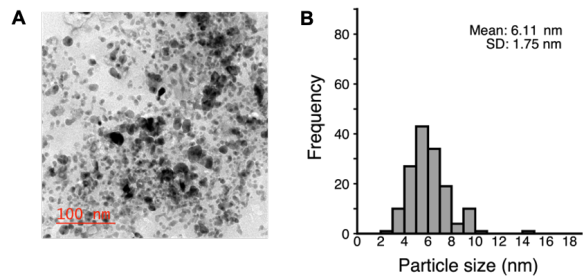

**Figure S9.** A) TEM image of 100  $\mu$ M lipoic acid AgNP. B) Corresponding size histogram with >100 random particles counted per sample.

### S3. Composition of DMEM – High Glucose Liquid Media (HyClone Cat. No. SH30284.01)

| Component description                       | mg/L   | mmol/L  |
|---------------------------------------------|--------|---------|
| <b>Inorganic salts</b>                      |        |         |
| Calcium chloride                            | 200    | 1.8021  |
| Ferric nitrate-9H <sub>2</sub> O            | 0.1    | 0.0002  |
| Potassium chloride                          | 400    | 5.3655  |
| Magnesium sulfate                           | 97.67  | 0.8112  |
| Sodium chloride                             | 6400   | 109.514 |
| Sodium phosphate monobasic H <sub>2</sub> O | 125    | 0.9059  |
| <b>Amino acids</b>                          |        |         |
| L-Arginine-HCl                              | 84     | 0.3987  |
| L-Cystine-2HCl                              | 62.57  | 0.1998  |
| L-Glutamine                                 | 584    | 3.9959  |
| Glycine                                     | 30     | 0.3996  |
| L-Histidine-HCl-H <sub>2</sub> O            | 42     | 0.2004  |
| L-Isoleucine                                | 104.8  | 0.7989  |
| L-Leucine                                   | 104.8  | 0.7990  |
| L-Lysine-HCl                                | 146.2  | 0.8004  |
| L-Methionine                                | 30     | 0.2011  |
| L-Phenylalanine                             | 66     | 0.3995  |
| L-Serine                                    | 42     | 0.3997  |
| L-Threonine                                 | 95.2   | 0.7992  |
| L-Tryptophan                                | 16     | 0.0783  |
| L-Tyrosine-2Na-2H <sub>2</sub> O            | 103.79 | 0.3974  |
| L-Valine                                    | 93.6   | 0.7990  |
| <b>Vitamins</b>                             |        |         |
| Calcium D- pantothenate                     | 4      | 0.0084  |
| D-Pantothenic acid Na salt                  | 0      | 0       |
| Choline chloride                            | 4      | 0.0286  |
| Folic acid                                  | 4      | 0.0091  |
| Myo-inositol                                | 7      | 0.0389  |
| Niacinamide                                 | 4      | 0.0328  |
| Pyridoxine-HCl                              | 4      | 0.0195  |
| Riboflavin                                  | 0.4    | 0.0011  |
| Thiamine-HCl                                | 4      | 0.0119  |
| <b>Other</b>                                |        |         |
| D-Glucose                                   | 4500   | 24.9778 |
| HEPES                                       | 0      | 0       |
| Phenol red-Na                               | 0      | 0       |
| Sodium pyruvate                             | 0      | 0       |
| Sodium bicarbonate                          | 3700   | 44.0424 |
